# Supplementary material
Source: publisher figshare collection journal article supplement (https://acs.figshare.com/ndownloader/files/15634424)
Supplement: Supplementary file 1 [file 15634424]

# Supporting Information

## **Polyamide Nanofiltration Membranes Incorporated with Cellulose Nanocrystals for Enhanced Water Flux and Chlorine Resistance**

*Sheng Huang<sup>a</sup>, Ming-Bang Wu<sup>b</sup>, Cheng-Ye Zhu<sup>b</sup>, Meng-Qi Ma<sup>b</sup>, Jing Yang<sup>b</sup>, Jian Wu<sup>\*a</sup>, Zhi-Kang Xu<sup>\*b</sup>*

<sup>a</sup>Department of Chemistry, Zhejiang University, Hangzhou 310027, China

<sup>b</sup>MOE Key Laboratory of Macromolecular Synthesis and Functionalization, and Key Laboratory of Adsorption and Separation Materials & Technologies of Zhejiang Province, Department of Polymer Science and Engineering, Zhejiang University, Hangzhou 310027, China

\*Corresponding authors

E-mail addresses: jianwu@zju.edu.cn (Jian Wu), xuzk@zju.edu.cn (Zhi-Kang Xu)

Address (all the authors): Zheda Road NO. 38, Hangzhou 310027, China.

## Table of contents

**Figure S1.** The chemical structure of CNCs. (page S3)

**Figure S2.** Photograph of CNCs suspension and its AFM image. (page S3)

**Figure S3.** FT-IR/ATR spectra of PSf substrate, TFC and TFN-50 NFMs. (page S4)

**Table S1.** XPS data of the PSf substrate and nanofiltration membranes. (page S4)

**Figure S4.** C1s spectrum of NFMs. (page S5)

**Figure S5.** 3D AFM images of a) TFC, b) TFN-6, c) TFN-12, d) TFN-25, e) TFN-50, f) TFN-100 NFMs with a scan size of  $5\ \mu\text{m} \times 5\ \mu\text{m}$ . (page S6)

**Table S2.** Roughness of TFC and TFN NFMs. (page S7)

**Figure. S6** Normalized water flux and salt rejection of the TFN-50 NFM after soaking in alcohol and n-hexane for 24 h. (page S7)

**Figure S7.** SEM images of TFC A) to D) and TFN-50 NFMs a) to d) after chlorination for different time (1-4 h). (page S8)

**Figure S8.** a) Dynamic contact angles of the TFC NFMs chlorinated for different time (1-4 h); b) Dynamic contact angles of the TFN-50 NFMs chlorinated for different time (1-4 h). (page S8)

**Table S3.** XPS data of the TFC and TFN NFMs after chlorination for 4 h. (page S8)

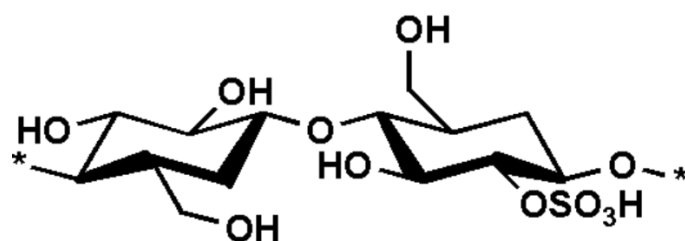

**Figure S1.** Chemical structure of CNCs.

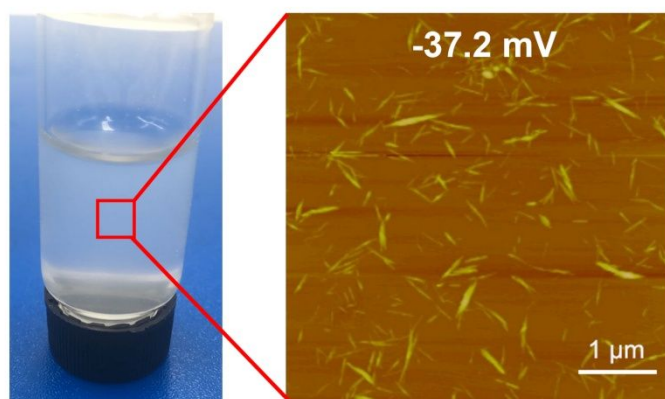

**Figure S2.** Photograph of CNCs suspension and its AFM image.

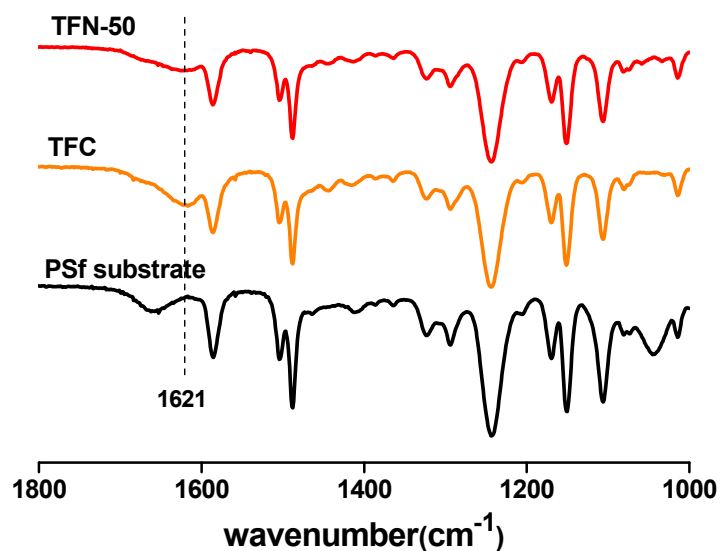

**Figure S3.** FT-IR/ATR spectra of polysulfone substrate, TFC NFMs and TFN-50 NFMs.

**Table S1.** XPS data of the polysulfone substrate and nanofiltration membranes

| Sample       | C1s content<br>(%) | O1s content<br>(%) | N1s content<br>(%) | S2p content<br>(%) |
|--------------|--------------------|--------------------|--------------------|--------------------|
| Polysulfone  | 77.41              | 17.44              | 3.88               | 1.28               |
| TFC NFMs     | 70.20              | 18.25              | 11.31              | 0.24               |
| TFN-6 NFMs   | 68.94              | 19.52              | 11.44              | 0.10               |
| TFN-12 NFMs  | 69.19              | 18.82              | 11.88              | 0.11               |
| TFN-25 NFMs  | 70.25              | 17.99              | 11.66              | 0.11               |
| TFN-50 NFMs  | 68.79              | 19.39              | 11.63              | 0.19               |
| TFN-100 NFMs | 70.00              | 19.11              | 10.19              | 0.70               |

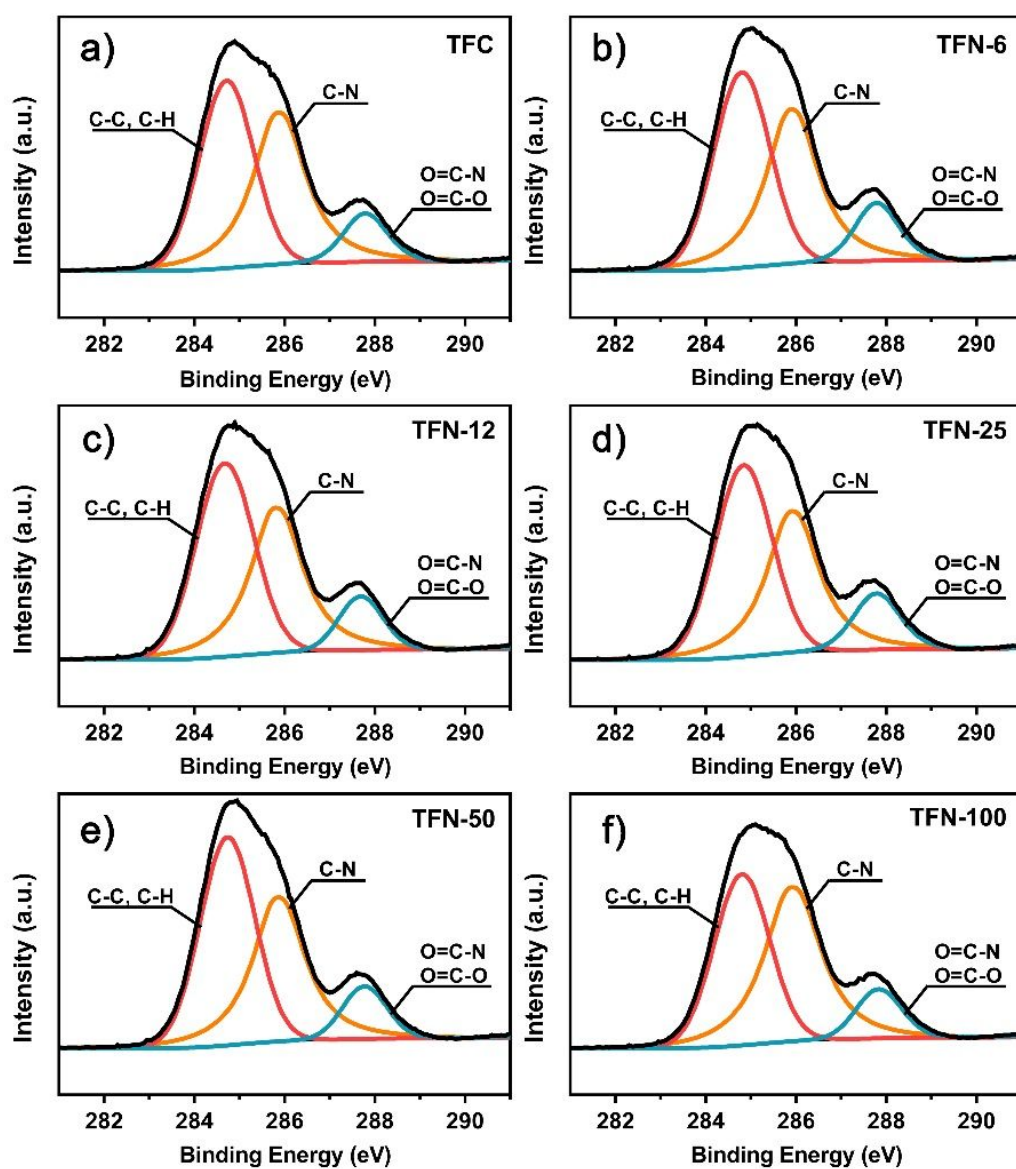

**Figure S4.** C1s spectra of our TFC NFMs and TFN NFMs.

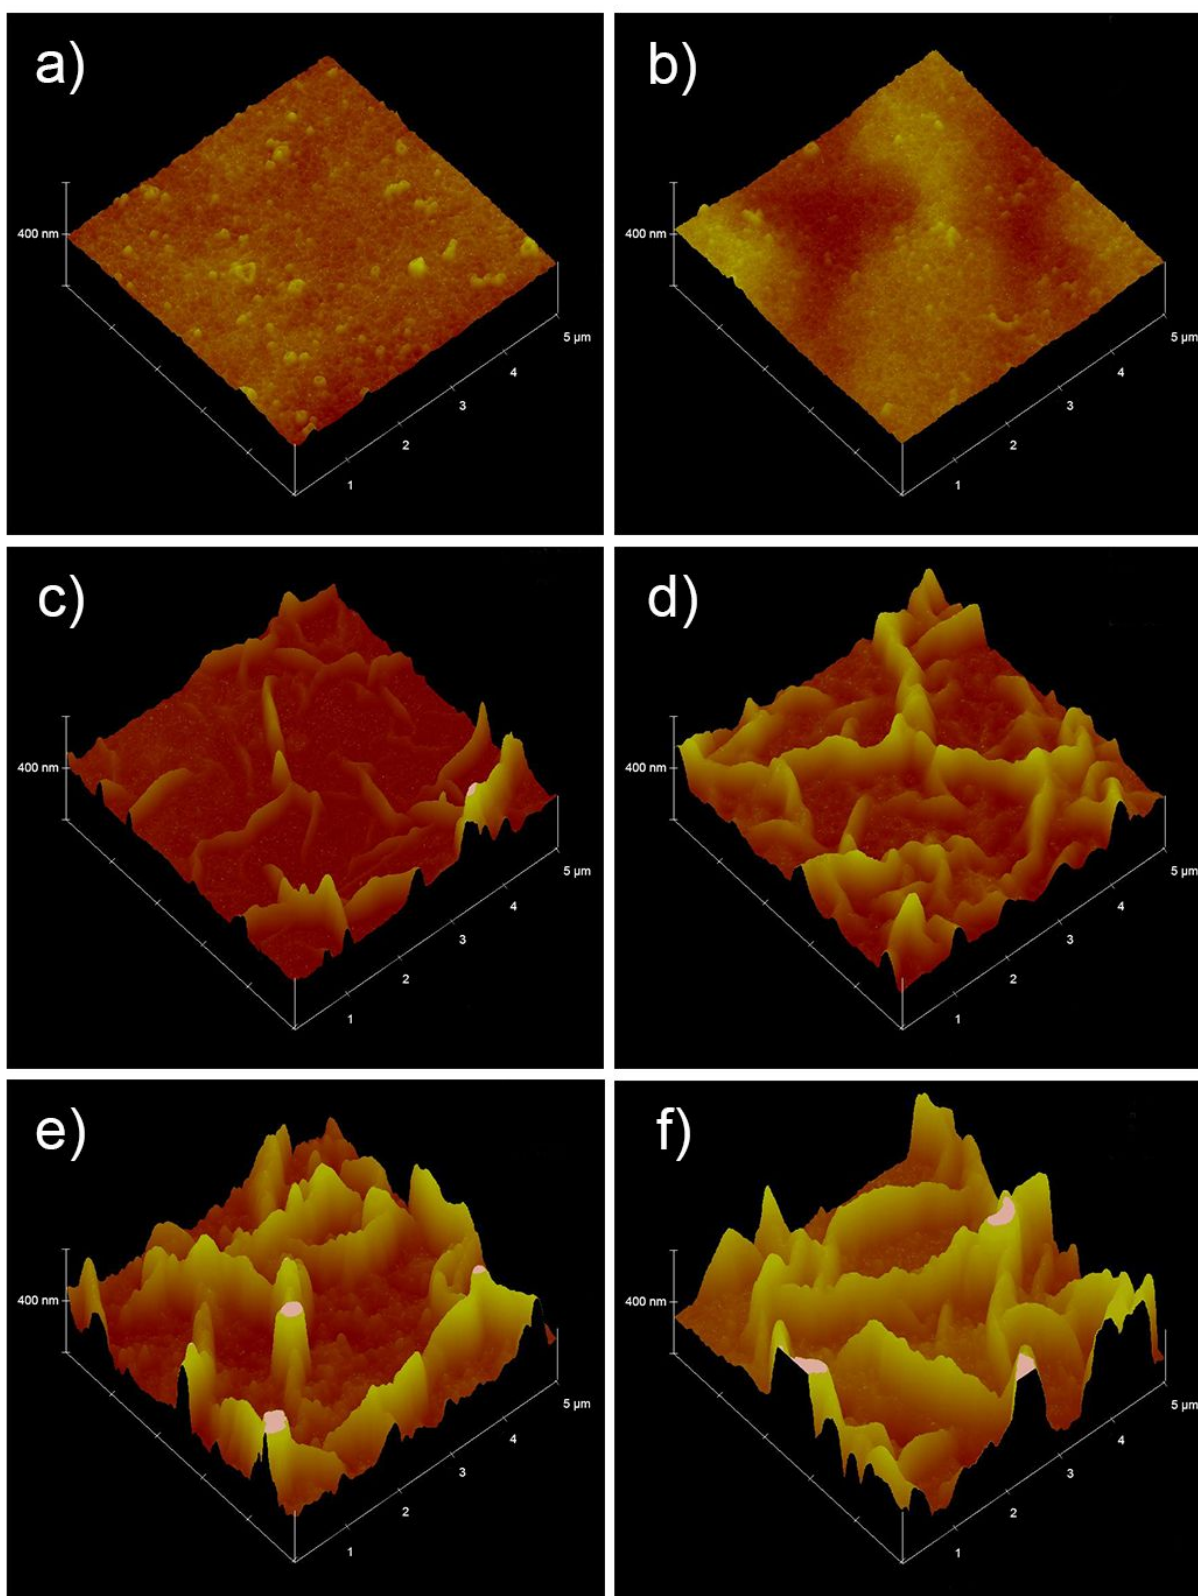

**Figure S5.** 3D AFM images of a) TFC, b) TFN-6, c) TFN-12, d) TFN-25, e) TFN-50, f) TFN-100 NFMs with a scan size of  $5\ \mu\text{m} \times 5\ \mu\text{m}$ .

**Table S2.** Roughness of TFC NFMs and TFN NFMs

| Sample  | $R_a$ (nm)         | $R_{rms}$ (nm)     |
|---------|--------------------|--------------------|
| TFC     | $9.73 \pm 2.33$    | $12.95 \pm 2.55$   |
| TFN-6   | $13.34 \pm 7.25$   | $17.12 \pm 7.49$   |
| TFN-12  | $33.84 \pm 8.43$   | $49.54 \pm 12.48$  |
| TFN-25  | $64.20 \pm 3.65$   | $77.64 \pm 4.83$   |
| TFN-50  | $115.68 \pm 25.90$ | $144.74 \pm 27.15$ |
| TFN-100 | $114.47 \pm 14.41$ | $138.04 \pm 17.11$ |

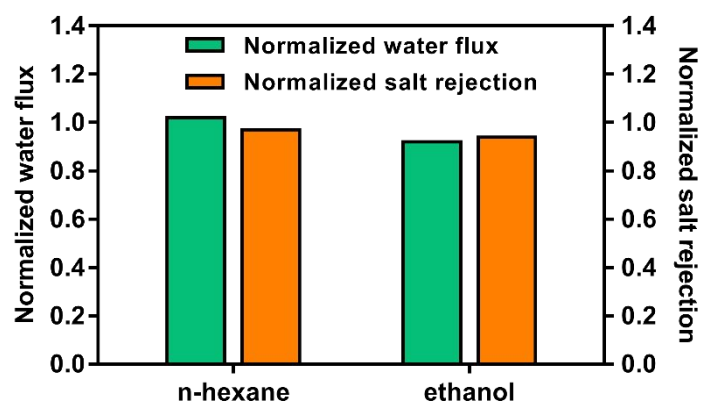**Figure. S6** Normalized water flux and salt rejection of the TFN-50 NFMs after soaking in alcohol and n-hexane for 24 h.

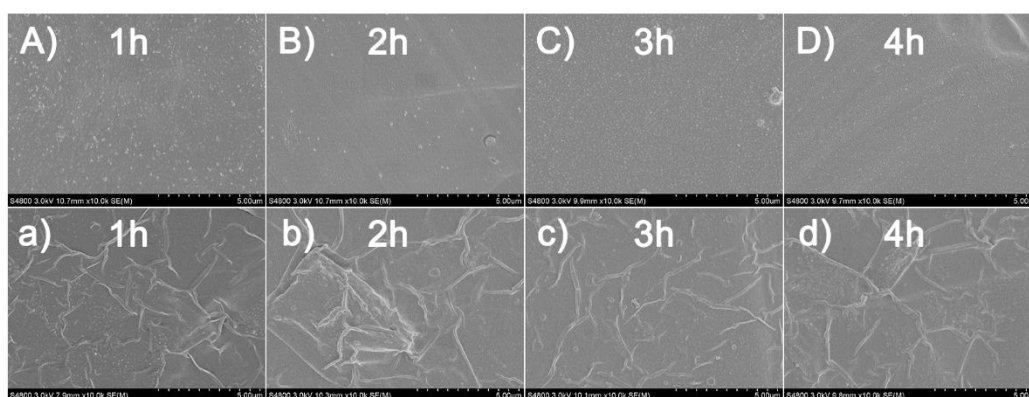

**Figure S7.** SEM images of TFC NFMs A) to D) and TFN-50 NFMs a) to d) after chlorination for different time (1-4 h).

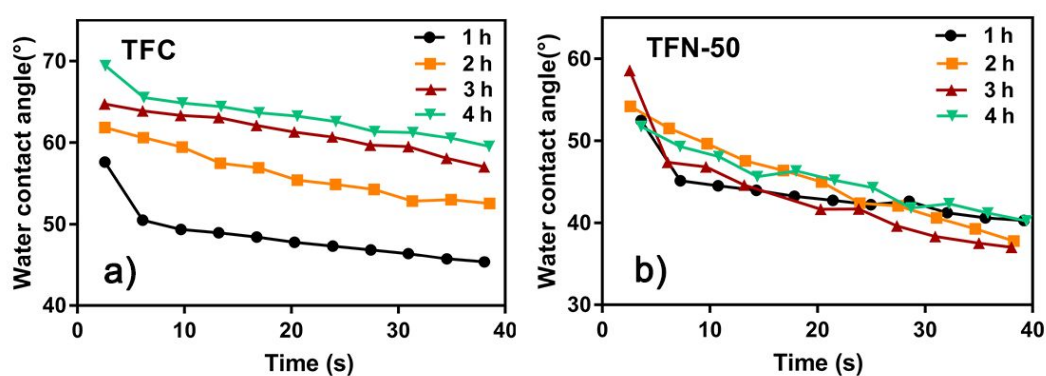

**Figure S8.** a) Dynamic contact angles of the TFC NFMs chlorinated for different time (1-4 h); b) Dynamic contact angles of the TFN-50 NFMs chlorinated for different time (1-4 h).

**Table S3.** XPS data of the TFC NFMs and TFN NFMs after chlorination for 4 h.

| Sample | C1s content (%) | O1s content (%) | N1s content (%) | S2p content (%) | Cl2p content (%) |
|--------|-----------------|-----------------|-----------------|-----------------|------------------|
| TFC    | 68.18           | 18.95           | 11.52           | 0.15            | 1.21             |
| TFN-50 | 65.64           | 20.31           | 12.46           | 0.17            | 1.42             |
